# Supplementary material for: Rosmarinic Acid-Loaded Polymeric Nanoparticles Prepared by Low-Energy Nano-Emulsion Templating: Formulation, Biophysical Characterization, and In Vitro Studies
Source: MDPI journal article supplement (doi:10.3390/ma15134572), 2022-06-29
Supplement: s1 [file s1]

## Supporting Information

### **Rosmarinic acid-loaded polymeric nanoparticles prepared by low-energy nano-emulsion templating: formulation, biophysical characterisation, and *in vitro* studies**

Jessica García-Melero, Joan-Josep López-Mitjavila, María José García-Celma, Carlos Rodríguez-Abreu and Santiago Grijalvo

#### **CONTENT**

|                                                                                                 |   |
|-------------------------------------------------------------------------------------------------|---|
| <b>Figure S1.</b> Chemical structure of Rosmarinic acid (RA) and RA-loaded PLGA NPs             | 2 |
| <b>Table S1.</b> HPLC conditions                                                                | 2 |
| <b>Figure S2.</b> DLS size distribution of unloaded PLGA NPs                                    | 3 |
| <b>Figure S3.</b> DLS size distributions of RA-loaded PLGA NPs.                                 | 3 |
| <b>Figure S4.</b> Dark-field microscopy studies                                                 | 4 |
| <b>Figure S5.</b> Calibration curve of RA                                                       | 5 |
| <b>Figure S6.</b> Fitted curve release kinetic models                                           | 5 |
| <b>Table S2.</b> Drug release parameters                                                        | 6 |
| <b>Figure S7.</b> PLGA_PC images                                                                | 6 |
| <b>Figure S8.</b> DLS size distributions of PLGA_PC and RA-loaded PLGA_PC                       | 7 |
| <b>Figure S9.</b> Calibration curve of a model protein                                          | 7 |
| <b>Figure S10.</b> PLGA NPs images in the absence of 10%FBS                                     | 8 |
| <b>Figure S11.</b> <i>In vitro</i> scavenging effect of free RA and EC <sub>50</sub> estimation | 8 |
| <b>Figure S12.</b> DLS size distribution of fluorescently labelled polymeric NPs                | 9 |

**A**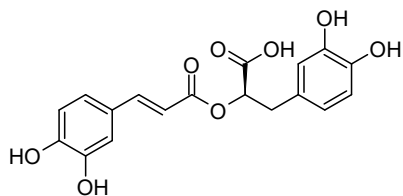

▲ Rosmarinic acid (RA)

**B**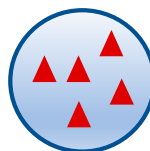

RA-loaded PLGA polymeric nanoparticles

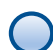

PLGA polymeric matrix

**Figure S1.** A. Chemical structure of Rosmarinic acid (RA); B. Representation of RA-loaded polymeric nanoparticles (NPs) used in this article

**Table S1.** Gradient elution conditions used to analyze RA elution by HPLC with a flow rate of 1 mL·min<sup>-1</sup>.

| Time (min) | %Water (A) | %Acetonitrile (B) |
|------------|------------|-------------------|
| 0          | 100        | 0                 |
| 5          | 90         | 10                |
| 10         | 70         | 30                |
| 15         | 50         | 50                |
| 16         | 0          | 100               |
| 18         | 50         | 50                |
| 20         | 100        | 0                 |

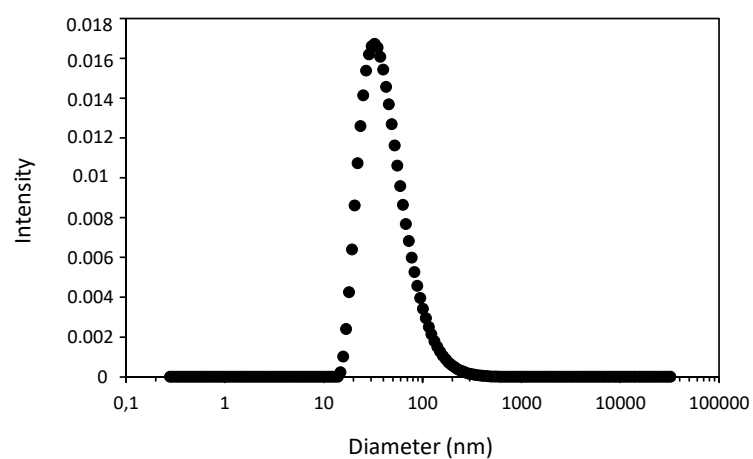

**Figure S2.** DLS size distribution of unloaded PLGA NPs

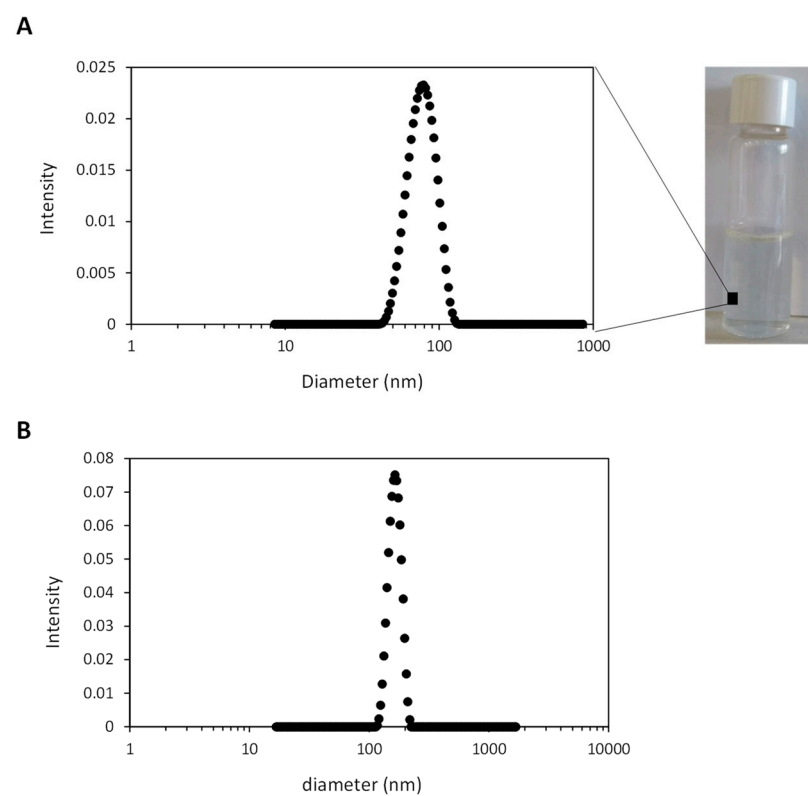

**Figure S3.** DLS size distributions of RA-loaded PLGA NPs prepared from ethyl acetate (A) and a mixture of ethyl acetate and ethanol in a ratio of 90:10 (B), respectively.

Dark-field microscopy images (100X)    Dark-field hyperspectral microscopy images (100X)

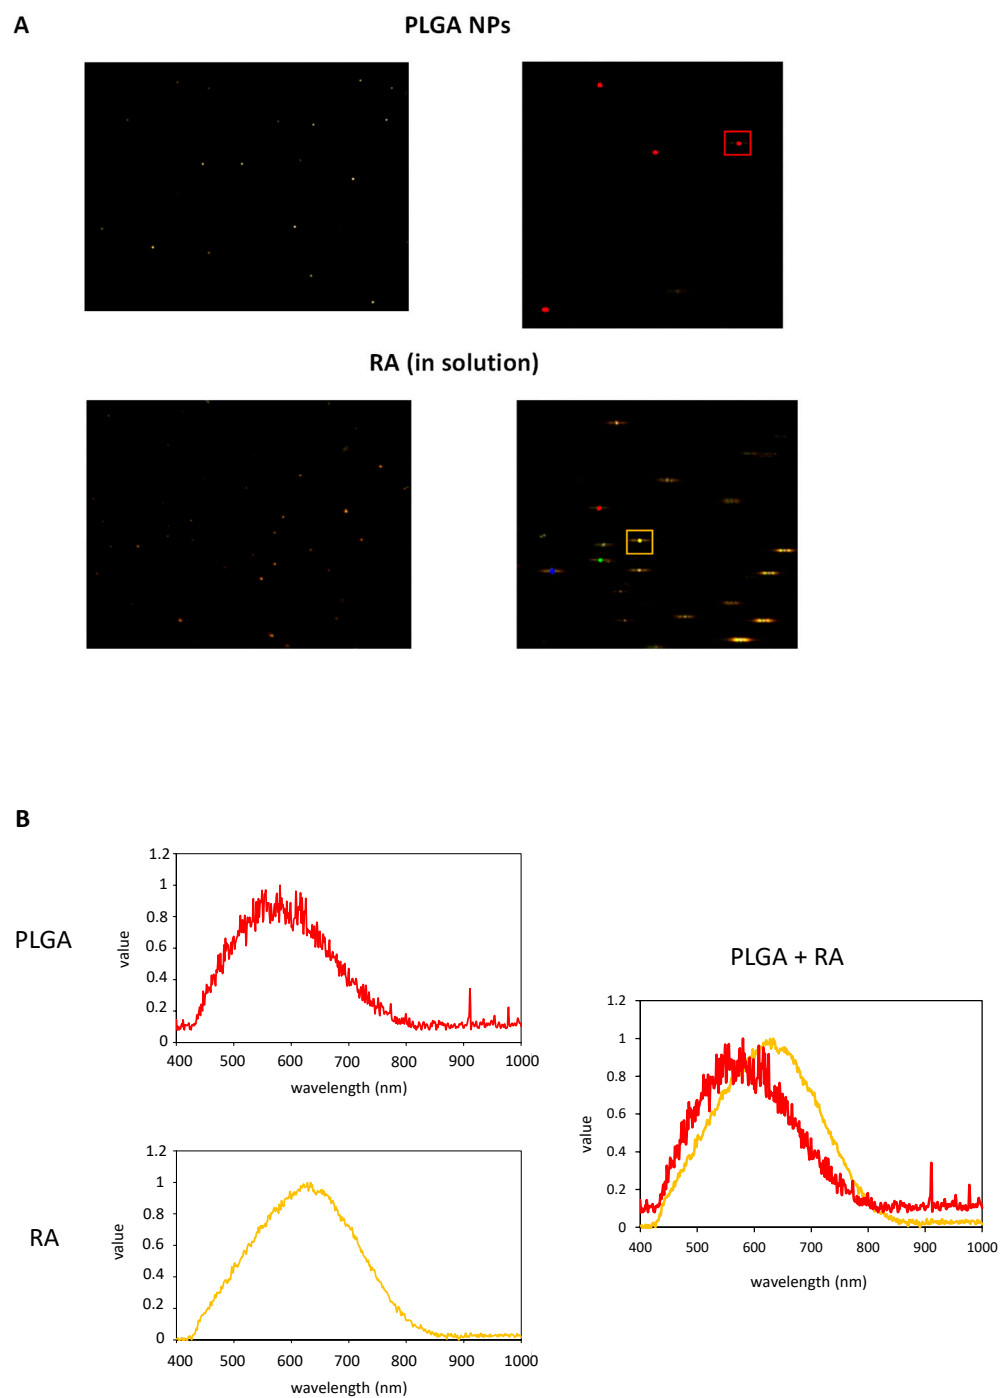

**Figure S4.** A. Dark-field and dark-field hyperspectral microscopy images of PLGA NPs and RA; B. Scattering spectra (normalized to the lamp spectrum) of a selected region of PLGA NPs and RA (see insert)

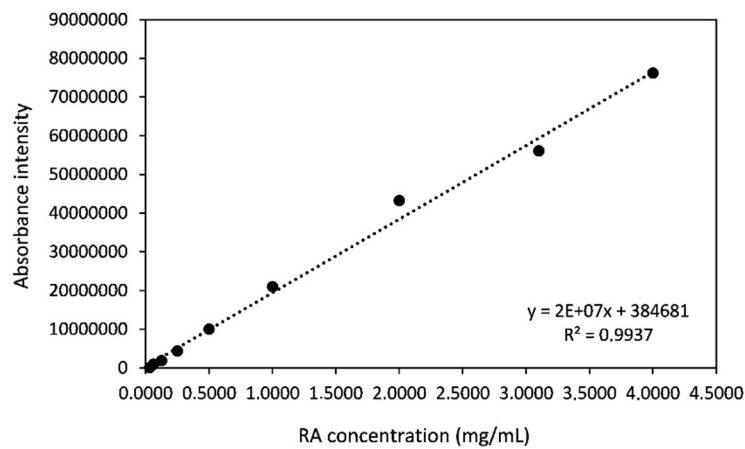

**Figure S5.** HPLC calibration curve for RA

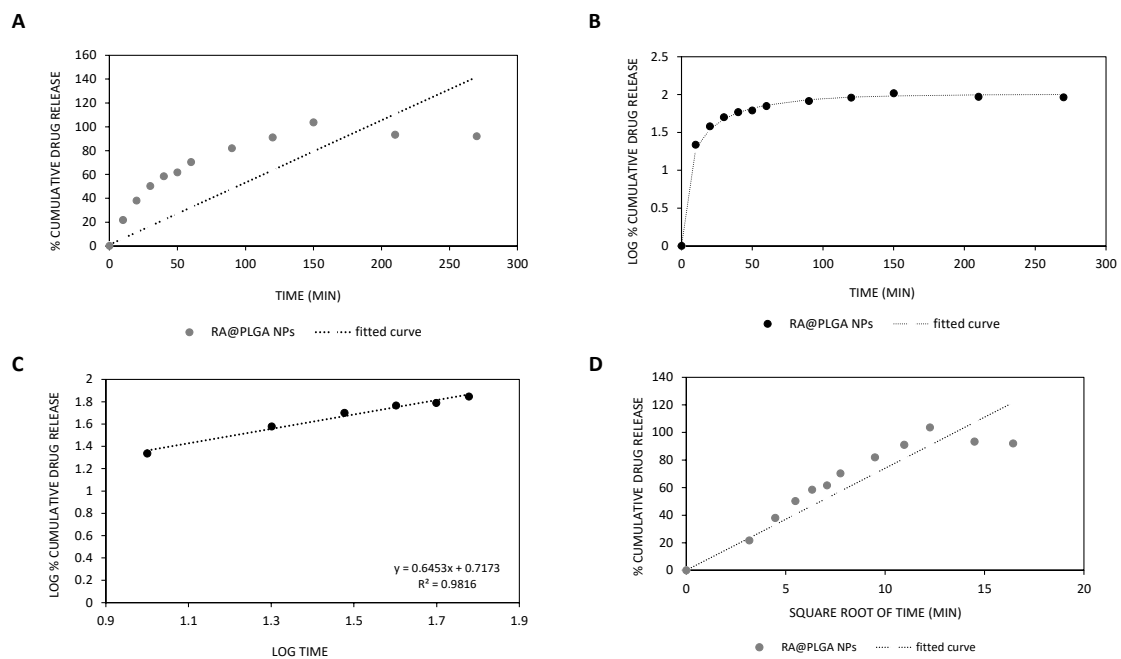

**Figure S6.** Fitted curves for RA release experimental data using (A) zero-order; (B) first-order; (C) Korsmeyer-Peppas, and (D) Higuchi equation kinetic models. For D, data were fitted for the 60% of the drug release from the nanoparticles.

**Table S2.** Drug release parameters for RA-loaded PLGA NPs according to zero-order, first-order, Korsmeyer, and Higuchi equation models

| Zero-order                                       |       | First-order                                              |       | Korsmeyer-Peppas                            |      |        | Higuchi                                      |       |
|--------------------------------------------------|-------|----------------------------------------------------------|-------|---------------------------------------------|------|--------|----------------------------------------------|-------|
| $\frac{M_t}{M_\infty} = Q_0 \times K_0 \times t$ |       | $\frac{M_t}{M_\infty} = 100 \times (1 - e^{-K \cdot t})$ |       | $\frac{M_t}{M_\infty} = K_{K-P} \times t^n$ |      |        | $\frac{M_t}{M_\infty} = K_H \times \sqrt{t}$ |       |
| $K_0$                                            | $r^2$ | K                                                        | $r^2$ | $K_{K-P}$                                   | $n$  | $r^2$  | $K_H$                                        | $r^2$ |
| 0.52                                             | 0.799 | 0.021                                                    | 0.992 | 9.24                                        | 0.48 | 0.982* | 7.40                                         | 0.965 |

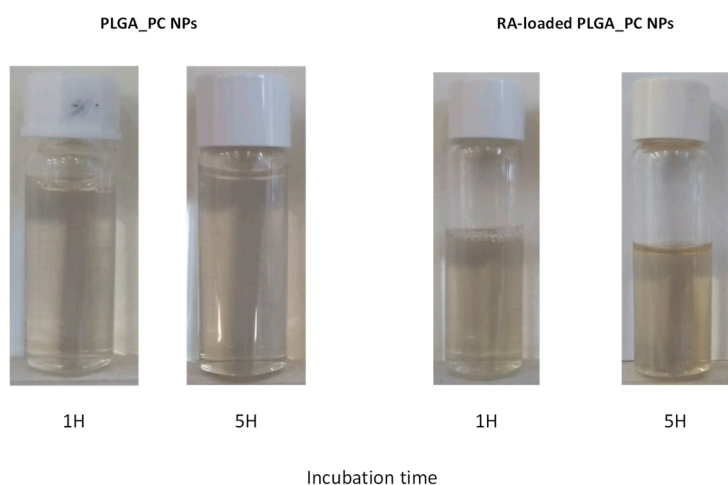

**Figure S7.** Visual aspect of PLGA\_PC NPs (non-loaded and RA-loaded) at two incubation times (1 and 5 hours) at 37 °C and 10% FBS.

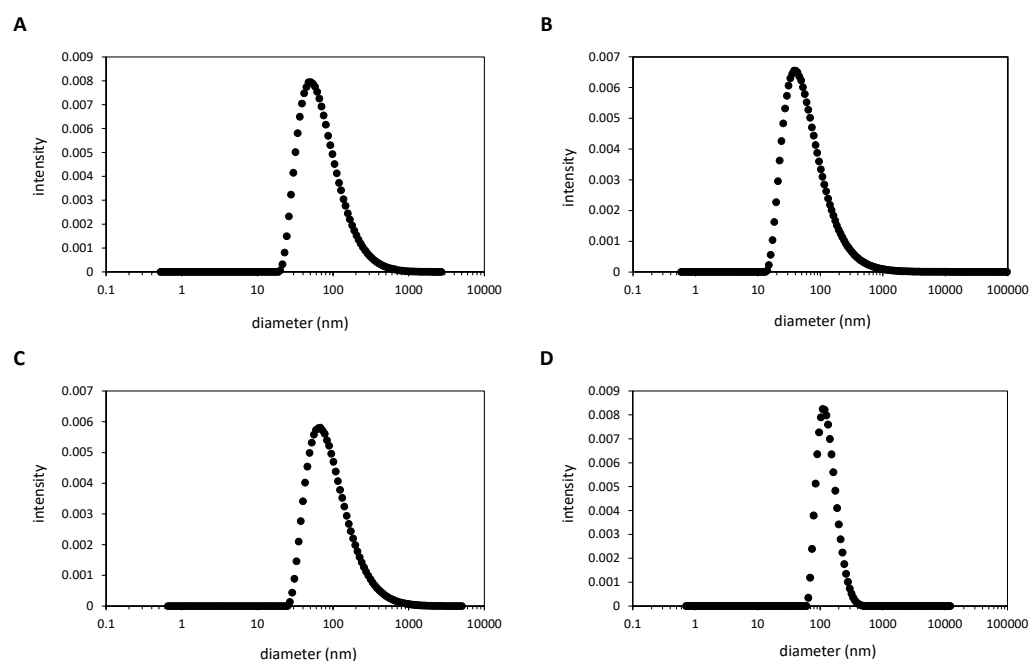

**Figure S8.** DLS size distributions of PLGA\_PC (A, B) and RA-loaded PLGA\_PC (C, D) after 1 (A, C) and 5-hour (B, D) incubation. PC NPs were isolated by ultracentrifugation and resuspended in 2 mL of 1X PBS

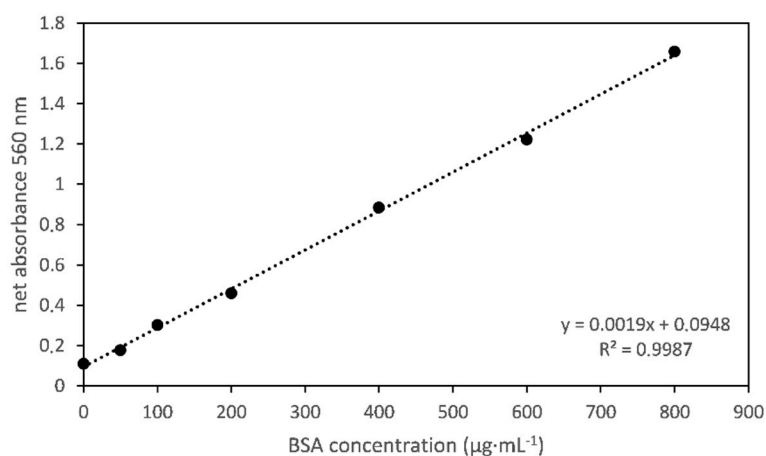

**Figure S9.** Calibration curve using a model protein (BSA) at different concentrations ranging from 100 to 800  $\mu\text{g}\cdot\text{mL}^{-1}$ . The equation  $Y=0.0019x+0.0948$  was used to quantify the protein corona concentration adsorbed onto the surface of PLGA NPs

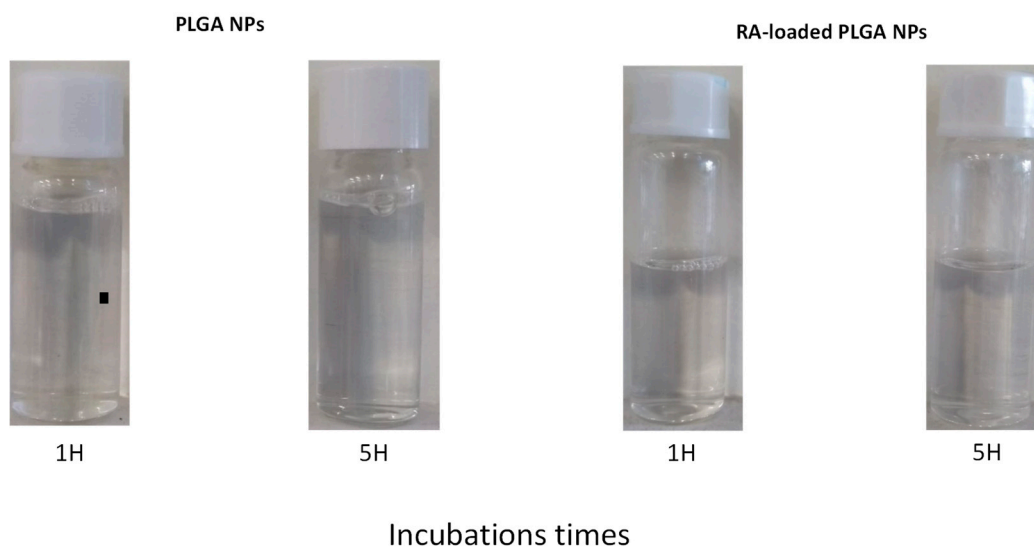

**Figure S10** Visual aspect of PLGA NPs (non-loaded and RA-loaded) at two incubation times (1 and 5 hours) at 37 °C in the absence of 10% FBS.

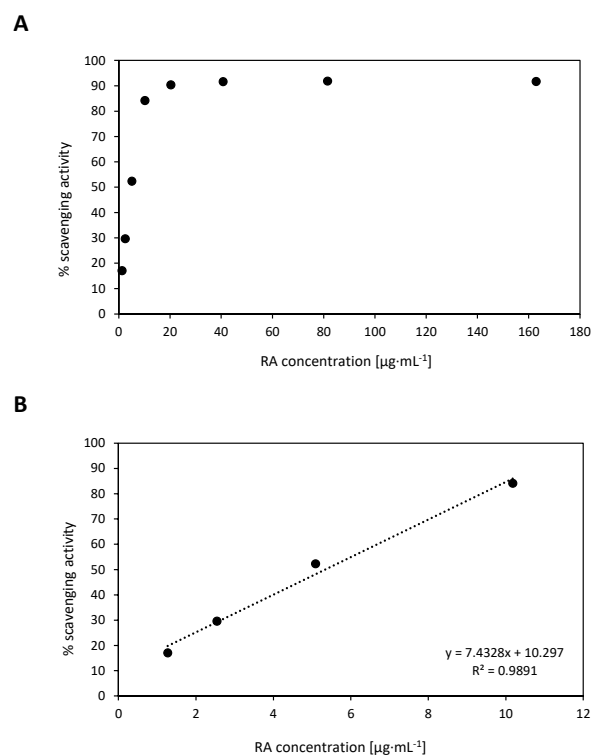

**Figure S11.** *In vitro* scavenging effect of free RA using DPPH $\cdot$  assay (A) and EC<sub>50</sub> estimation calculated from a regression line equation (B)



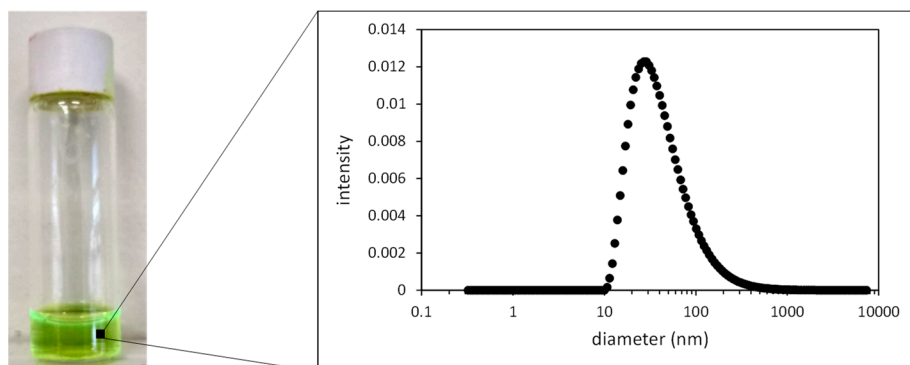

**Figure S12.** DLS size distribution of fluorescently labelled polymeric NPs containing coumarin-6
